# Supplementary material
Source: publisher site journal article supplement (https://www.dovepress.com/get_supplementary_file.php?f=283031.docx)
Supplement: Supplementary file 1 [file get_supplementary_file.php]

**Supplementary Figure S1**

a.
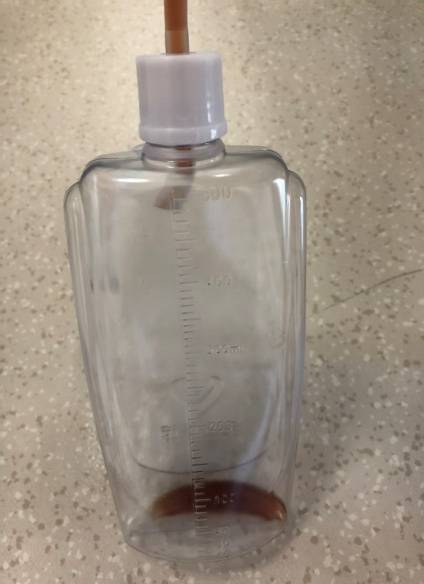
 b.
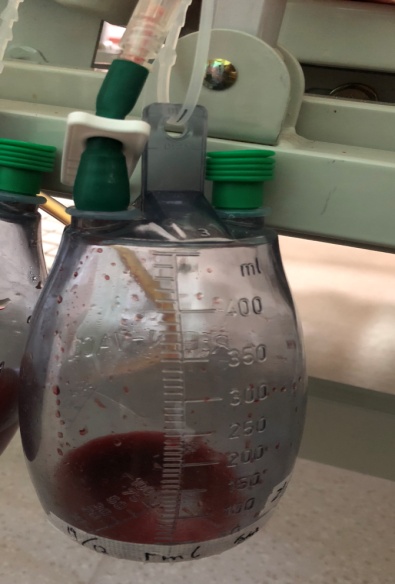


**Supplementary Figure S1.** Figure of negative vacuum drainage bottle.

a. the low vacuum drainage bottle (pressure=－12kPa) b. the high vacuum drainage bottle (pressure=－98kPa).

Supplementary Table S1. Comparison of the different negative drainage system used in this study.

|  | Low vacuum drainage system | High vacuum drainage system |
| --- | --- | --- |
|  | KANGLI®, W-II type wound drainage, SUNLIGHT MEDICAL, China | Jet-Vac®, Redon wound drainage, pfm medical, Germany |
| Maximum negative pressure (kpa) | -12 | -98 |
| Bottle volume (ml) | 500 | 400(+50ml safety volume) |
| Application | No limited | Orthopaedics or breast surgery, non-abdominal surgery |
| Connector | Bottle cap, plug-connection | Luer-Lock connection, plug-connection |
| Shape of drain | Round | Round |
| Size of drain | 12 Fr | 12 CH |
| Scale | Rough graduation | Rough and fine graduation |
| Advantage | 1.Double one-way valve to prevent reverse flow.  2.Easy to change the bottle.  3.Squeeze bottle body to produce negative pressure | 1. Do not need to replace the bottle until the drainage is full.  2.Stable high negative pressure. |
| Defect | 1.Need to change drainage bottle per day. | 1.Need to change a new drainage once the bottle occurs air leakage.  2.It’s complicated process to change the bottle. |

Size of diameter, 1 Fr ≈1 CH.
